# Supplementary material
Source: PubMed Central journal article supplement (PMC4056858)
Supplement: ml2001714_si_001.pdf [file ml2001714_si_001.pdf]

# DISCOVERY OF NOVEL $\alpha 4\beta 2$ NEURONAL NICOTINIC RECEPTOR MODULATORS THROUGH STRUCTURE-BASED VIRTUAL SCREENING

*Kiran V. Mahasenan<sup>1</sup>, Ryan E. Pavlovicz<sup>2</sup>, Brandon J. Henderson<sup>3</sup>, Tatiana F. González-Cestari<sup>3</sup>, Bitna Yi<sup>3</sup>,  
Dennis B. McKay<sup>3</sup>, Chenglong Li<sup>1,2\*</sup>*

*<sup>1</sup>Division of Medicinal Chemistry and Pharmacognosy, College of Pharmacy, The Ohio State University;*

*<sup>2</sup>Biophysics Program, The Ohio State University; <sup>3</sup>Division of Pharmacology, College of Pharmacy, The Ohio  
State University, USA*

## CONTENT

**Figure S1** : The schematic representation of the workflow described in the manuscript.

**Table S1** : Chembridge IDs for virtual screening hits and negative controls

**Figure S2** : Putative allosteric binding site of the hit compounds on the  $\alpha 4\beta 2$  nAChR extracellular domain.

**Model Building, Molecular Dynamics, and AutoDock Docking**

**Calcium Accumulation Assay**

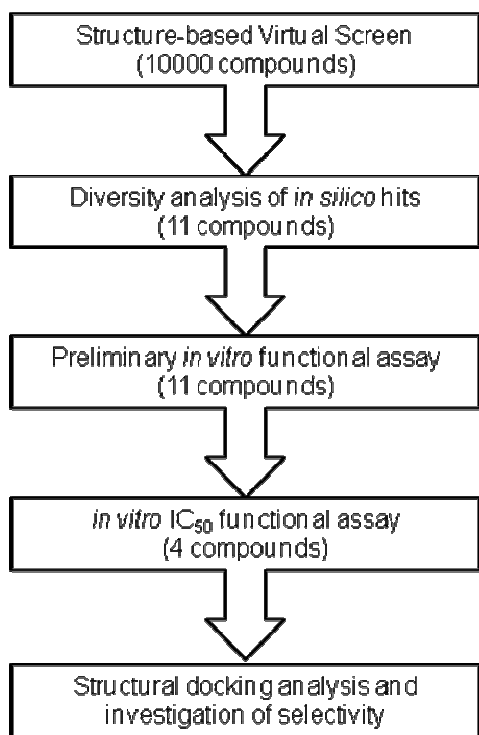

**Figure S1:** The schematic representation of the workflow described in the manuscript.

**Table S1.** Chembridge IDs for virtual screening hits and negative controls

| Compound | ChemBridge ID |
|----------|---------------|
| 1        | 7995652       |
| 2        | 9042047       |
| 3        | 9006145       |
| 4        | 7992142       |
| 5        | 9058912       |
| 6        | 7995406       |
| 7        | 9010069       |
| 8        | 9040046       |
| 9        | 9025009       |
| 10       | 9030802       |
| 11       | 9055804       |
| N1       | 7974335       |
| N2       | 9052807       |
| N3       | 7961836       |

Compounds 1-11 represent the molecules tested for experimental activity in the calcium accumulation assay as selected from the top-ranking molecules of the virtual screening protocol. Compounds N1-N3 are negative controls.

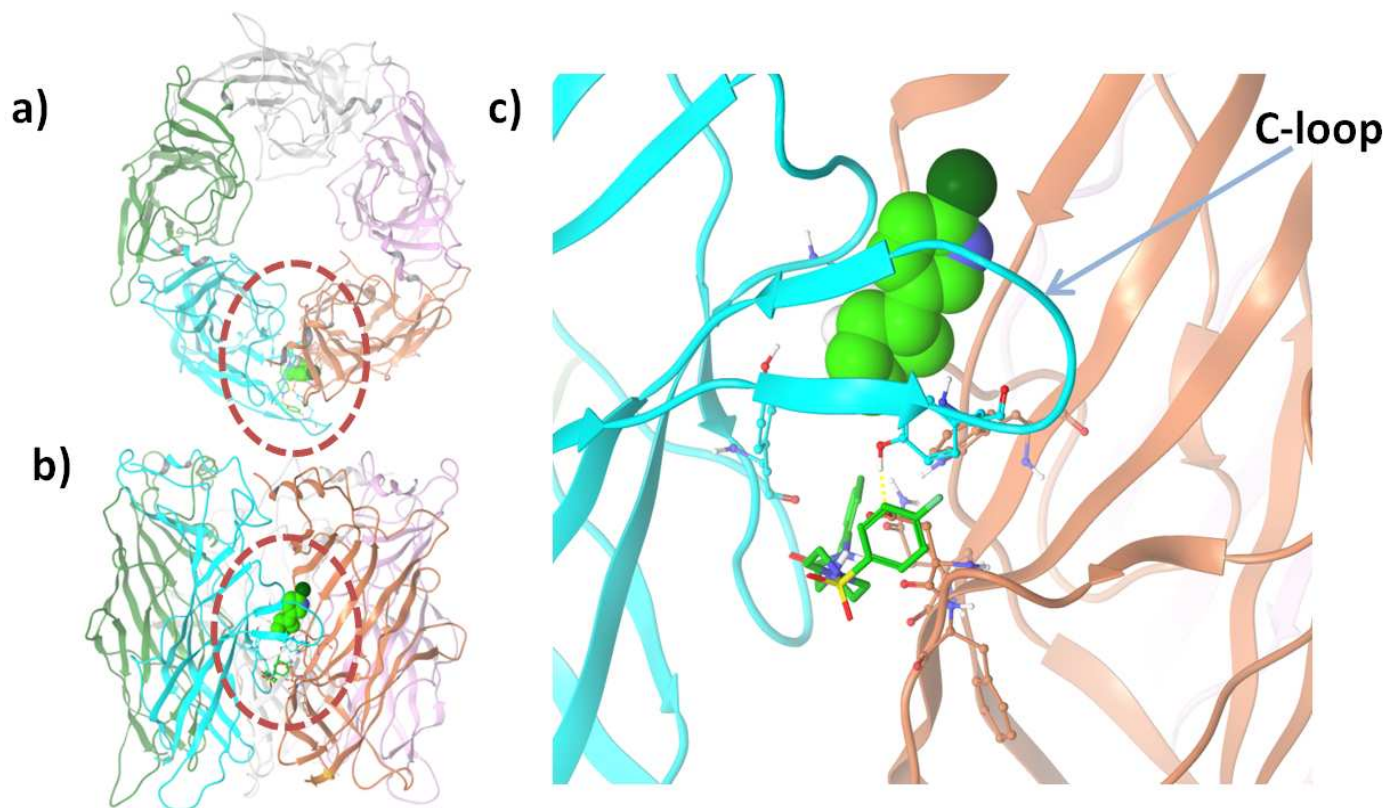

**Figure S2:** Putative allosteric binding site of the hit compounds on the h $\alpha$ 4 $\beta$ 2 nAChR extracellular domain. **A.** Top view of the extracellular domain of the nAChR. **B.** Side view. **C.** Zoomed in side-view of the binding pocket. Epibatidine is displayed as space filling representation (green carbon) whereas the docked conformation of compound **2** is in stick representation (green carbon). The monomer chains are differentially colored ( $\alpha$ 4=cyan,  $\beta$ 2=light orange).

### Model Building, Molecular Dynamics, and AutoDock Docking

Human  $\alpha$ 4 $\beta$ 2 nAChR extracellular domain homology models were built in an iterative fashion with MODELLER9v1 based on PDB IDs: 1UW6, 2BYR, 2BJ0, and 2QC1 as previously described.<sup>1, 2</sup> The virtual screening template was prepared by docking the agonist epibatidine to multiple receptor conformation as extracted from a molecular dynamics (MD) simulation. The MD simulation used the Amber ff99 force field and Sander algorithm with explicit water solvation (15 Å buffer of water around all sides of the protein).<sup>3</sup> Sodium ions were added to achieve charge neutrality for simulation which used the particle mesh Ewald method to treat electrostatic interactions. After a 500 steps of steepest descent and 1500 steps of conjugate gradient minimization, the system was heated from 0 to 300 K over 200 ps while all protein atoms were restrained in place. Finally, a 5 ns production run at constant temperature and pressure (300 K, 1 atm) was carried out. Receptor conformations were extracted at regular 200 ps intervals to which epibatidine was docked with AutoDock4. AutoDock ligands were assigned Gasteiger charges then docked 100 individual times; the docking results were clustered by all-atom RMSD with a tolerance of 2 Å. The conformation to which epibatidine

docked most similarly to the crystallographic position (PDB ID: 2BYQ) was used as the virtual screening template.

### Calcium Accumulation Assay

For the calcium accumulation assays, HEK tsA201 cells stably expressing either  $\alpha 4\beta 2$  nAChRs or  $\alpha 3\beta 4$  nAChRs were used with either fluo-4AM or Calcium 5. An assay previously reported was used with slight modifications.<sup>4,5</sup> Plated cells were incubated at 37°C, 5% CO<sub>2</sub>, in DMEM supplemented with 10% fetal bovine serum, 10 mM L-glutamine, 0.7 mg/ml G418, 100 units/ml penicillin, 100 µg/ml streptomycin, and 100 µg/ml zeocin. Cells were used for experiments at ~100% confluency, typically 24 to 48 hrs after plating. Using fluo-4AM, cells were washed (100 µl) with HEPES-buffered Krebs (HBK) solution, and incubated (protected from light) for 30 minutes at 37°C followed by 30 minutes at 24°C with 40 µl of HBK containing 2 µM fluo-4-AM solution, 2.5 mM probenecid, and 0.05% pluronic F-127. When using the Calcium 5 probe, the cells were loaded with Calcium 5 (50% of manufacturer's recommendation) for 1 hour protected from light. Fluo-4-AM and pluronic F-127 were dissolved in DMSO (100% and 20% w/v, respectively), resulting in a final DMSO concentration of <0.1%. After loading the cells with fluo-4-AM, the cells were washed (1X) and 80 µl of HBK were added to each well. The plates were then placed into a fluid handling integrated fluorescence plate reader (FlexStation, Molecular Devices, Sunnyvale, CA). Fluo-4 fluorescence was read at excitation of 494 nm and emission of 520 nm from the bottom of the plate, and changes in fluorescence were monitored at ~0.7 second intervals. Calcium 5 fluorescence was read at an excitation of 485 nm and emission of 525 nm. Probenecid (2.5 mM) was included in all of solutions once the cells were loaded with fluo-4 to prevent its leakage from the cells. Probenecid was not used with Calcium 5. Functional responses were quantified by first calculating the net fluorescence changes (the difference between control sham-treated and control agonist-treated groups). Net peak (maximum) fluorescence values during the third treatment period for both the control-agonist treatment group and the antagonist (with agonist) treatment group were determined. Results were expressed as a percentage of control-agonist groups.

### References

- (1) Henderson, B. J.; Pavlovicz, R. E.; Allen, J. D.; Gonzalez-Cestari, T. F.; Orac, C. M.; Bonnell, A. B.; Zhu, M. X.; Boyd, R. T.; Li, C.; Bergmeier, S. C.; McKay, D. B. Negative allosteric modulators that target human  $\alpha 4\beta 2$  neuronal nicotinic receptors. *J Pharmacol Exp Ther* **2010**, 334, 761-74.
- (2) Pavlovicz, R. E.; Henderson, B. J.; Bonnell, A. B.; Boyd, R. T.; McKay, D. B.; Li, C. Identification of a novel negative allosteric site on human  $\alpha 4\beta 2$  and  $\alpha 3\beta 4$  neuronal nicotinic acetylcholine receptors. *PLoS ONE* published online 2011, DOI:10.1371/journal.pone.0024949
- (3) Case, D. A.; Cheatham, T. E., 3rd; Darden, T.; Gohlke, H.; Luo, R.; Merz, K. M., Jr.; Onufriev, A.; Simmerling, C.; Wang, B.; Woods, R. J. The Amber biomolecular simulation programs. *J Comput Chem* **2005**, 26, 1668-88.
- (4) Gonzalez-Cestari, T. F.; Henderson, B. J.; Pavlovicz, R. E.; McKay, S. B.; El-Hajj, R. A.; Pulipaka, A. B.; Orac, C. M.; Reed, D. D.; Boyd, R. T.; Zhu, M. X.; Li, C.; Bergmeier, S. C.; McKay, D. B. Effect of novel negative allosteric modulators of neuronal nicotinic receptors on cells expressing native and recombinant nicotinic receptors: implications for drug discovery. *J Pharmacol Exp Ther* **2009**, 328, 504-15.

(5) McKay, D. B.; Chang, C.; Gonzalez-Cestari, T. F.; McKay, S. B.; El-Hajj, R. A.; Bryant, D. L.; Zhu, M. X.; Swaan, P. W.; Arason, K. M.; Pulipaka, A. B.; Orac, C. M.; Bergmeier, S. C. Analogs of methyllycaconitine as novel noncompetitive inhibitors of nicotinic receptors: pharmacological characterization, computational modeling, and pharmacophore development. *Mol Pharmacol* **2007**, 71, 1288-97.
